# Supplementary material
Source: MDPI journal article supplement (https://www.mdpi.com/2410-3888/9/3/100)
Supplement: s1 [file s1]

Table S1. Primers used in this study.

| Primer name                        | Forward Primer (5'-3') | Reverse Primer (5'-3') | Purpose |
|------------------------------------|------------------------|------------------------|---------|
| Calpain-9                          | CAAAGGTCACGCCTACTCCG   | GATTTATCCACGACGCTCC    | qRT-PCR |
| Claudin-7                          | TCATCACTGCTGTGGCTACTT  | GGGCTTTACGCACTTTATTT   | qRT-PCR |
| C-type lectin                      | ATGCTTCTTATTCTTGCCACAG | CAAGTAGCAGCGTCCGAAAT   | qRT-PCR |
| C3<br>Complement<br>component      | CGAGTCCACCATTTCATCC    | ACCTTCCGACACCACCTTCA   | qRT-PCR |
| E3<br>ubiquitin-pro<br>tein ligase | CAGGGCAGAAATACTACGGG   | CAGCAGCTTGTGCTTGAATG   | qRT-PCR |
| Galectin-3                         | GGAATGAGGGAGCGGTTCTT   | TGCCTTTGCCTAATGGAGTG   | qRT-PCR |
| Interferon<br>induced<br>protein 2 | CCTGGCTTGGTCCATCTTTA   | CAGTGCGGCGATATTCAGCT   | qRT-PCR |
| $\beta$ -actin                     | GCACAGTAAAGGCGTTGTGA   | ACATCTGCTGGAAGGTGGAC   | qRT-PCR |
